# Supplementary material
Source: PubMed Central journal article supplement (PMC4076384)
Supplement: supp_113.113134_biolreprod.113.113134-2.pdf [file supp_113.113134_biolreprod.113.113134-2.pdf]

Supplemental Table S1. Physiological parameters.

| Parameter<br>(mean ± SD)                                  | Females                        |                                |                               | Males       |                                |                                |
|-----------------------------------------------------------|--------------------------------|--------------------------------|-------------------------------|-------------|--------------------------------|--------------------------------|
|                                                           | FB                             | IVF KAA                        | IVF WM                        | FB          | IVF KAA                        | IVF WM                         |
| <i>birth weight (gm)</i>                                  | 1.7 ± .1                       | 1.7 ± .2                       | 1.7 ± .2                      | 1.7 ± .2    | 1.8 ± .1                       | 1.8 ± .2                       |
| <i>length at birth (mm)</i>                               | 31.8 ± 1.0                     | 31.6 ± 1.2                     | 31.7 ± 1.8                    | 31.7 ± 1.3  | 32.1 ± .8                      | 31.9 ± 1.6                     |
| <i>BPD at birth (mm)</i>                                  | 8.2 ± .4                       | nd                             | 7.8 ± .5                      | 7.9 ± .5    | nd                             | 7.9 ± .5                       |
| <i>anogenital distance at birth (mm)</i>                  | 1.2 ± .1                       | 1.2 ± .2                       | 1.1 ± .1                      | 1.7 ± .2    | 1.7 ± .2                       | 1.6 ± .3                       |
| <i>n* for day of birth parameters</i>                     | 21 (5)                         | 15 (4)                         | 18 (7)                        | 23 (7)      | 10 (3)                         | 26 (6)                         |
| <i>age at testicular descent (days)</i>                   | nd                             | nd                             | nd                            | 22.2 ± 1.3  | nd                             | 22.8 ± 1.6                     |
| <i>age at perputial separation (days)</i>                 | nd                             | nd                             | nd                            | 24.0 ± 1.5  | nd                             | 23.7 ± 1.4                     |
| <i>age at vaginal opening (days)</i>                      | 26.6 ± 0.8                     | nd                             | 26.1 ± 1.4                    | nd          | nd                             | nd                             |
| <i>n* for sexual maturation parameters</i>                | 20 (5)                         | -                              | 15 (4)                        | 20 (6)      | -                              | 21 (5)                         |
| <i>percent body fat at 8 wks</i>                          | 23.0 ± 6.6                     | 19.1 ± 6.5                     | 23.0 ± 4.8                    | 22.9 ± 6.2  | 18.9 ± 4.2                     | 22.7 ± 3.9                     |
| <i>BMD at 8 wks (g x 10<sup>-3</sup>/cm<sup>2</sup>)</i>  | 54.4 ± 1.9                     | 55.7 ± 3.2                     | 56.8 ± 3.4                    | 56.6 ± 2.8  | 61.5 ± 4.1                     | 59.3 ± 3.0                     |
| <i>n* DEXA parameters at 8 wks</i>                        | 19 (5)                         | 14 (4)                         | 15 (6)                        | 20 (6)      | 11 (3)                         | 21 (5)                         |
| <i>percent body fat at 28 wks</i>                         | <b>48.8 ± 10.4<sup>Δ</sup></b> | <b>45.0 ± 10.1<sup>Δ</sup></b> | 40.7 ± 12.9                   | 36.9 ± 6.8  | 36.3 ± 4.7                     | 37.7 ± 8.4                     |
| <i>BMD at 28 wks (g x 10<sup>-3</sup>/cm<sup>2</sup>)</i> | <b>62.4 ± 03.5<sup>Δ</sup></b> | <b>60.2 ± 6.4<sup>Δ</sup></b>  | <b>62.1 ± 3.8<sup>Δ</sup></b> | 59.2 ± 03.4 | <b>60.7 ± 4.8<sup>**</sup></b> | <b>62.1 ± 5.1<sup>**</sup></b> |
| <i>n* DEXA parameters at 28 wks</i>                       | 16 (4)                         | 11 (4)                         | 11 (4)                        | 20 (6)      | 11 (3)                         | 21 (5)                         |
| <i>Serum corticosterone (ng/ml)</i>                       | nd                             | nd                             | nd                            | 38.5 ± 16.0 | nd                             | 43.1 ± 23.3                    |
| <i>n*</i>                                                 | -                              | -                              | -                             | 12 (3)      | -                              | 16 (4)                         |

nd= not done

\* n= number of individuals (number of litters)

Δ- significantly different from males in the same group at 8 weeks

\*\* significantly greater than FB

# significantly less than FB

Supplemental Table S2A. Body weights of female mice.

| age (wks) | FB<br>N= mice<br>(litters) | FB mean $\pm$<br>SD | IVF <sub>KAA</sub><br>N= mice<br>(litters) | IVF <sub>KAA</sub> mean<br>$\pm$ SD | IVF <sub>WM</sub><br>N= mice<br>(litters) | IVF <sub>WM</sub> mean $\pm$<br>SD |
|-----------|----------------------------|---------------------|--------------------------------------------|-------------------------------------|-------------------------------------------|------------------------------------|
| 0         | 21 (7)                     | 1.71 $\pm$ 0.13     | 14 (4)                                     | 1.73 $\pm$ 0.2                      | 16 (7)                                    | 1.68 $\pm$ 0.2                     |
| 1         | 21 (7)                     | 6.02 $\pm$ 0.44     | 14 (4)                                     | 6.24 $\pm$ 0.62                     | 16 (7)                                    | 6.19 $\pm$ 0.55                    |
| 2         | 21 (7)                     | 10.74 $\pm$ 0.88    | 14 (4)                                     | 11.59 $\pm$ 1.56                    | 15 (6)                                    | 11.08 $\pm$ 0.54                   |
| 3         | 22 (7)                     | 15.99 $\pm$ 1.57    | 14 (4)                                     | 16.18 $\pm$ 1.93                    | 15 (6)                                    | 16.47 $\pm$ 1.01                   |
| 4         | 19 (5)                     | 21.28 $\pm$ 1.87    | 14 (4)                                     | 21.35 $\pm$ 1.91                    | 15 (6)                                    | 21.17 $\pm$ 1.09                   |
| 5         | 19 (5)                     | 24.35 $\pm$ 2.09    | 14 (4)                                     | 23.18 $\pm$ 2.43                    | 15 (6)                                    | 24.46 $\pm$ 1.34                   |
| 6         | 19 (5)                     | 25.69 $\pm$ 2.39    | 14 (4)                                     | 24.47 $\pm$ 3.12                    | 15 (6)                                    | 26.16 $\pm$ 2.26                   |
| 7         | 19 (5)                     | 26.97 $\pm$ 3.44    | 14 (4)                                     | 26.28 $\pm$ 3.3                     | 15 (6)                                    | 26.92 $\pm$ 2.76                   |
| 8         | 19 (5)                     | 28.2 $\pm$ 4.12     | 14 (4)                                     | 26.64 $\pm$ 4.3                     | 15 (6)                                    | 29.38 $\pm$ 3.91                   |
| 9         | 19 (5)                     | 29.07 $\pm$ 4.34    | 14 (4)                                     | 28.53 $\pm$ 5.69                    | 15 (6)                                    | 30.85 $\pm$ 4                      |
| 10        | 19 (5)                     | 31.74 $\pm$ 5.24    | 14 (4)                                     | 29.2 $\pm$ 5.72                     | 15 (6)                                    | 33.38 $\pm$ 4.4                    |
| 11        | 19 (5)                     | 33.47 $\pm$ 5.81    | 14 (4)                                     | 31.27 $\pm$ 7.48                    | 15 (6)                                    | 36.32 $\pm$ 6.02                   |
| 12        | 18 (5)                     | 34.18 $\pm$ 5.61    | 14 (4)                                     | 33.22 $\pm$ 7.51                    | 14 (5)                                    | 38.2 $\pm$ 5.58                    |
| 13        | 16 (4)                     | 36.62 $\pm$ 7.03    | 14 (4)                                     | 34.76 $\pm$ 8.8                     | 12 (5)                                    | 40.43 $\pm$ 6.92                   |
| 14        | 16 (4)                     | 39.88 $\pm$ 5.67    | 14 (4)                                     | 36.39 $\pm$ 8.74                    | 12 (5)                                    | 41 $\pm$ 7.01                      |
| 15        | 16 (4)                     | 41.71 $\pm$ 6.2     | 14 (4)                                     | 38.35 $\pm$ 9.19                    | 11 (4)                                    | 43.69 $\pm$ 6.24                   |
| 16        | 16 (4)                     | 43.01 $\pm$ 6.01    | 20 (4)                                     | 39 $\pm$ 8.25                       | 11 (4)                                    | 41.07 $\pm$ 7.35                   |
| 17        | 16 (4)                     | 44.71 $\pm$ 6.5     | 8 (4)                                      | 45.1 $\pm$ 11.06                    | 11 (4)                                    | 41.9 $\pm$ 7.26                    |
| 18        | 16 (4)                     | 44.49 $\pm$ 5.66    | 11 (4)                                     | 42.78 $\pm$ 10.59                   | 11 (4)                                    | 42.89 $\pm$ 7.25                   |
| 19        | 16 (4)                     | 45.36 $\pm$ 6.47    | 11 (4)                                     | 41.76 $\pm$ 10.66                   | 11 (4)                                    | 43.55 $\pm$ 7.11                   |
| 20        | 16 (4)                     | 43.32 $\pm$ 5.79    | 11 (4)                                     | 41.77 $\pm$ 12.31                   | 11 (4)                                    | 42.47 $\pm$ 7.33                   |
| 21        | 16 (4)                     | 42.95 $\pm$ 5.99    | 11 (4)                                     | 42.55 $\pm$ 12.1                    | 11 (4)                                    | 43.14 $\pm$ 7.82                   |
| 22        | 16 (4)                     | 44.77 $\pm$ 6.15    | 11 (4)                                     | 43.24 $\pm$ 13.06                   | 11 (4)                                    | 44.4 $\pm$ 7.43                    |
| 23        | 16 (4)                     | 45.49 $\pm$ 6.24    | 11 (4)                                     | 46.3 $\pm$ 12.59                    | 15 (4)                                    | 47.06 $\pm$ 7.35                   |
| 24        | 16 (4)                     | 46.28 $\pm$ 6.08    | 11 (4)                                     | 48.67 $\pm$ 12.1                    | 7 (3)                                     | 44.37 $\pm$ 9.04                   |
| 25        | 16 (4)                     | 46.77 $\pm$ 5.47    | 11 (4)                                     | 50.45 $\pm$ 12.21                   | 11 (4)                                    | 46.65 $\pm$ 8.55                   |
| 26        | 16 (4)                     | 47.06 $\pm$ 6.07    | 11 (4)                                     | 50.12 $\pm$ 13.17                   | 11 (4)                                    | 47.64 $\pm$ 8.88                   |
| 27        | 16 (4)                     | 48.18 $\pm$ 6.15    | 11 (4)                                     | 50.31 $\pm$ 13.09                   | 11 (4)                                    | 47.89 $\pm$ 9.72                   |
| 28        | 16 (4)                     | 48.37 $\pm$ 6.67    | 11 (4)                                     | 51.22 $\pm$ 13.48                   | 11 (4)                                    | 48.76 $\pm$ 9.19                   |
| 29        | 16 (4)                     | 49.65 $\pm$ 6.26    | 11 (4)                                     | 52.08 $\pm$ 13.36                   | 15 (4)                                    | 50.48 $\pm$ 8.88                   |

Supplemental Table S2B. Body weights of male mice.

| age (wks) | FB<br>N= mice<br>(litters) | FB mean $\pm$<br>SD | IVF <sub>KAA</sub><br>N= mice<br>(litters) | IVF <sub>KAA</sub> mean $\pm$<br>SD | IVF <sub>WM</sub><br>N= mice<br>(litters) | IVF <sub>WM</sub> mean $\pm$<br>SD |
|-----------|----------------------------|---------------------|--------------------------------------------|-------------------------------------|-------------------------------------------|------------------------------------|
| 0         | 23 (7)                     | 1.69 $\pm$ 0.18     | 11 (3)                                     | 1.75 $\pm$ 0.19                     | 24 (6)                                    | 1.74 $\pm$ 0.25                    |
| 1         | 23 (7)                     | 5.64 $\pm$ 0.8      | 11 (3)                                     | 6.24 $\pm$ 0.47                     | 24 (6)                                    | 6.53 $\pm$ 0.64                    |
| 2         | 23 (7)                     | 9.97 $\pm$ 1.33     | 11 (3)                                     | 10.95 $\pm$ 1.2                     | 21 (5)                                    | 11.34 $\pm$ 0.8                    |
| 3         | 25 (7)                     | 15.5 $\pm$ 1.99     | 11 (3)                                     | 16.68 $\pm$ 1.5                     | 20 (5)                                    | 17.46 $\pm$ 1.1                    |
| 4         | 21 (7)                     | 24.46 $\pm$ 2.43    | 11 (3)                                     | 25.74 $\pm$ 2.73                    | 21 (5)                                    | 26.65 $\pm$ 1.96                   |
| 5         | 21 (6)                     | 28.07 $\pm$ 2.28    | 11 (3)                                     | 29.44 $\pm$ 2.97                    | 21 (5)                                    | 31.23 $\pm$ 2.49                   |
| 6         | 19 (6)                     | 30.49 $\pm$ 2.56    | 11 (3)                                     | 32.48 $\pm$ 3.47                    | 21 (5)                                    | 33.89 $\pm$ 2.51                   |
| 7         | 20 (6)                     | 33.79 $\pm$ 2.61    | 11 (3)                                     | 35.19 $\pm$ 3.63                    | 21 (5)                                    | 36.41 $\pm$ 2.46                   |
| 8         | 20 (6)                     | 36.24 $\pm$ 3.29    | 11 (3)                                     | 36.42 $\pm$ 3.94                    | 21 (5)                                    | 39.42 $\pm$ 3.16                   |
| 9         | 20 (6)                     | 38.42 $\pm$ 4.09    | 11 (3)                                     | 38 $\pm$ 4.68                       | 21 (5)                                    | 41.5 $\pm$ 3.14                    |
| 10        | 20 (6)                     | 40.41 $\pm$ 4.23    | 11 (3)                                     | 39.27 $\pm$ 5.09                    | 21 (5)                                    | 43.81 $\pm$ 3.02                   |
| 11        | 20 (6)                     | 42.37 $\pm$ 4.57    | 11 (3)                                     | 41.16 $\pm$ 5.84                    | 21 (5)                                    | 46.51 $\pm$ 3.31                   |
| 12        | 20 (6)                     | 44.59 $\pm$ 4.89    | 11 (3)                                     | 42.87 $\pm$ 6.14                    | 21 (5)                                    | 48.46 $\pm$ 3.59                   |
| 13        | 20 (6)                     | 45.92 $\pm$ 5.12    | 11 (3)                                     | 44.88 $\pm$ 6.33                    | 21 (5)                                    | 50.35 $\pm$ 3.63                   |
| 14        | 20 (6)                     | 47.33 $\pm$ 5.68    | 11 (3)                                     | 46.86 $\pm$ 6.69                    | 21 (5)                                    | 52.19 $\pm$ 3.78                   |
| 15        | 20 (6)                     | 48.56 $\pm$ 5.73    | 11 (3)                                     | 48.55 $\pm$ 7.1                     | 21 (5)                                    | 53.35 $\pm$ 3.81                   |
| 16        | 20 (6)                     | 49.68 $\pm$ 5.92    | 18 (3)                                     | 48.57 $\pm$ 6.27                    | 21 (5)                                    | 54.16 $\pm$ 3.88                   |
| 17        | 20 (6)                     | 50.46 $\pm$ 5.84    | 4 (1)                                      | 58.22 $\pm$ 8.82                    | 21 (5)                                    | 55.33 $\pm$ 3.88                   |
| 18        | 20 (6)                     | 50.63 $\pm$ 6.55    | 11 (3)                                     | 52.28 $\pm$ 7.76                    | 21 (5)                                    | 56.63 $\pm$ 3.95                   |
| 19        | 20 (6)                     | 50.55 $\pm$ 7.06    | 10 (3)                                     | 51.26 $\pm$ 8.18                    | 21 (5)                                    | 56.16 $\pm$ 4.22                   |
| 20        | 20 (6)                     | 50.58 $\pm$ 7.05    | 11 (3)                                     | 51.83 $\pm$ 8.02                    | 21 (5)                                    | 55.22 $\pm$ 4.88                   |
| 21        | 20 (6)                     | 51.33 $\pm$ 6.98    | 11 (3)                                     | 53.18 $\pm$ 7.87                    | 21 (5)                                    | 56 $\pm$ 5.33                      |
| 22        | 20 (6)                     | 53.09 $\pm$ 6.9     | 11 (3)                                     | 54.96 $\pm$ 8.52                    | 21 (5)                                    | 57.41 $\pm$ 5.72                   |
| 23        | 20 (6)                     | 54.49 $\pm$ 6.46    | 11 (3)                                     | 56.74 $\pm$ 8.73                    | 22 (5)                                    | 57.79 $\pm$ 5.51                   |
| 24        | 20 (6)                     | 55.19 $\pm$ 6.37    | 11 (3)                                     | 57.99 $\pm$ 8.73                    | 20 (5)                                    | 59.38 $\pm$ 4.88                   |
| 25        | 20 (6)                     | 56.55 $\pm$ 6.09    | 11 (3)                                     | 59.04 $\pm$ 9.94                    | 21 (5)                                    | 60.6 $\pm$ 4.85                    |
| 26        | 20 (6)                     | 57.08 $\pm$ 6.17    | 11 (3)                                     | 60.46 $\pm$ 9.6                     | 21 (5)                                    | 61.7 $\pm$ 4.75                    |
| 27        | 20 (6)                     | 58.1 $\pm$ 6.44     | 10 (3)                                     | 61.47 $\pm$ 9.4                     | 21 (5)                                    | 62.06 $\pm$ 4.7                    |
| 28        | 20 (6)                     | 57.72 $\pm$ 6.84    | 11 (3)                                     | 60.59 $\pm$ 9.66                    | 21 (5)                                    | 62.38 $\pm$ 4.64                   |
| 29        | 13 (4)                     | 60.45 $\pm$ 6.63    | 11 (3)                                     | 61.48 $\pm$ 9.41                    | 17 (5)                                    | 61.62 $\pm$ 5.11                   |

Supplemental Table S3. Hyperinsulinemic-euglycemic clamp.

| <b>mean±S.D.</b>                                                | <b>FB</b><br>N= 9<br>(from 3 litters) | <b>IVF<sub>WM</sub></b><br>N= 10<br>(from 4 litters) |
|-----------------------------------------------------------------|---------------------------------------|------------------------------------------------------|
| Glucose (mg/dl) basal                                           | 93 ± 10                               | 95 ± 7                                               |
| Glucose (mg/dl) clamp                                           | 108±3                                 | 106±5                                                |
| GIR (mg/kg/min) at clamp                                        | 25.8 ± 8.3                            | 22.8 ± 8.2                                           |
| Insulin (ng/ml) at baseline                                     | 15 ± 4                                | 19.4 ± 4                                             |
| Insulin (ng/ml) at clamp                                        | 32 ± 8                                | 38 ± 10                                              |
| C-Peptide (ng/ml) at clamp                                      | 14 ± 3                                | 18 ± 4                                               |
| Total glucose flux (mg/kg/min) at baseline                      | 20.8 ± 6.9                            | 19.6 ± 5.3                                           |
| Total glucose flux (mg/kg/min) at clamp <sup>Δ</sup>            | 31.1 ± 7.0                            | <b>24.0 ± 3.8*</b>                                   |
| Endogenous glucose production (mg/kg/min) at baseline           | 18.8 ± 1.6                            | 21.0 ± 2.0                                           |
| Endogenous glucose production (mg/kg/min) at clamp <sup>Δ</sup> | 5.5 ± 6.5                             | 2.0 ± 7.3                                            |
| Rg (μmol/min/100gr tissue)                                      |                                       |                                                      |
| adipose                                                         | 4.3 ± 1.0                             | 4.1 ± 1.8                                            |
| brain                                                           | 48 ± 4                                | 53 ± 9.2                                             |
| diaphragm                                                       | 122 ± 35                              | 103 ± 27                                             |
| gastrocnemius                                                   | 20 ± 7                                | 20 ± 7                                               |
| heart                                                           | 237 ± 61                              | 291 ± 48                                             |
| soleus muscle                                                   | 71 ± 31                               | 76 ± 29                                              |
| superficial vastus lateralis                                    | 15 ± 3                                | 17 ± 7                                               |

<sup>Δ</sup> Values at clamp are the mean of the values at the 100 and 120 minute time points

\* Significantly less than FB, p<0.05
